## 1 **Title Page**

2 **Title:** A weighted graph of the projections to mouse auditory cortex

3 **Running title:** Projections to mouse auditory cortex

4

5 Nuno Macarico da Costa<sup>1</sup>, Kevan A.C. Martin<sup>1</sup>, Franziska D. Sägesser<sup>1</sup>

6 <sup>1</sup>Institute of Neuroinformatics, ETH / University of Zurich, CH-8057 Zürich, Switzerland

7 Current address of Nuno Macarico da Costa: Allen Institute for Brain Science, Seattle,

8 Washington 98103, USA

9

10 **Key words:** cortical connectivity, cortical hierarchy, modified rabies virus, distance rule.

11 Corresponding Author:

12 Franziska D. Sägesser, Institute of Neuroinformatics, ETH / University of Zurich,

13 Winterthurerstrasse 190, CH-8057 Zürich, Switzerland. phone: +41 44 635 3051, fax: +41

14 44 635 3053, e-mail: saegessf@ini.uzh.ch

15

## 16 **Acknowledgements**

17 **Funding.** This work was supported by the Schweizerischer Nationalfonds (SNF) Sinergia

18 grant to K.A.C. M. (grant number CRSII3\_130470/1); the ETH Institutskredit to K.A.C. M.

19 (grant number 74603/72102) and by the Human Frontier Science Program (HFSP), grant

20 number RGP 0032/2010.

## 21 **Abstract**

22 The projections to individual cortical areas from extrinsic sources are a major determinant  
23 of the area's function, but we lack comprehensive quantitative input maps even for primary  
24 sensory areas in most model species. To quantify all input sources to the mouse primary  
25 auditory cortex (Au1), we made localized injections of modified rabies virus (SAD $\Delta$ G-  
26 mCherry) into Au1 of five C57BL/6 mice and identified all the cortical and subcortical areas  
27 containing retrogradely labeled cells. Of all neurons projecting to Au1 from extrinsic areas,  
28 27 % were located in the ipsilateral cortex, 14 % in the contralateral cortex, and 58 % in  
29 subcortical regions (almost exclusively ipsilateral, predominantly in the medial geniculate  
30 nucleus). Although 90 % of the labeled cells in the ipsilateral cortex were located within  
31 1 mm of Au1, most cortical areas projected to Au1, including visual, somatosensory, motor,  
32 rhinal, cingulate and piriform cortices. The hierarchical relations of the cortical areas  
33 projecting to Au1 were determined based on the proportion of cell bodies in superficial  
34 versus deep layers. Feedback projections (from deep layers 5/6) dominated, but temporal  
35 association and auditory cortices were on the same hierarchical level, providing input from  
36 both superficial and deep layers. Au1 is embedded in a densely connected network that  
37 involves a high degree of cross-modal integration.

## 38 Introduction

39 New insights into the rules of inter-areal connectivity of neocortical circuits have been  
40 given by quantitative studies of the macaque monkey where retrograde tracing techniques  
41 combined with quantitative data collection and sophisticated statistical and graph theoretic  
42 analyses have completely revolutionized our concepts of cortical wiring in a primate brain  
43 (Markov et al., 2011, 2012, 2013; Ercsey-Ravasz et al., 2013). Whereas before macaque  
44 cortex was seen as a modular organization of sensory, motor and association areas linked  
45 in a 'small world' network, it is now clear that the networks are not small world, but dense,  
46 and the probability of connection between areas declines exponentially with physical  
47 distance. This latter feature means that the connections between nearest neighboring  
48 areas approach all-to-all, but long-range connections form a very small fraction of the total  
49 complement of input to an area.

50

51 In the comparatively tiny brain of the mouse, such quantitative retrograde studies have not  
52 been attempted, so it remains to be discovered whether the same rules of connectivity  
53 apply. One reason for the lack of comprehensive, detailed and quantitative studies is  
54 technical: cortical areas in the macaque are large, so large pressure injections of  
55 conventional tracers can be placed with high precision. But in the mouse, even primary  
56 areas are small, e.g. area 41 (primary auditory cortex, Au1) is only 0.8 mm<sup>2</sup> in area, and  
57 thus injecting sufficient amounts of conventional retrograde tracers with high accuracy is a  
58 challenge. Work on mouse cortical connectivity has revealed details of inter-areal  
59 projection maps of a number of visual areas (Wang and Burkhalter, 2007), and now a  
60 major goal is to describe the mouse 'connectome' by performing large-scale tracing  
61 studies (Oh et al., 2014; Zingg et al., 2014). These studies have not, however, exploited  
62 the quantitative methods used so successfully in the macaque.

63

64 In this study of the inputs to the primary auditory cortex in the mouse we adopted the  
65 methods pioneered in the macaque studies. The prime advantage of using retrograde  
66 rather than anterograde tracing methods is that counting neurons is far simpler than  
67 counting synapses. The number of retrogradely labeled neurons makes for a clearly  
68 defined measure of relative input strengths of different source areas to a target area. The  
69 cortical laminae where the projecting neurons are located provides additional information  
70 about the nature of the connection to the target area and gives hints concerning the  
71 relative hierarchical position of cortical source and target area (Rockland and Pandya,  
72 1979; Barone et al., 2000). Thus here we have expressed the relative connection 'weight'  
73 of each area as the fraction of retrogradely labeled neurons (FLN, Markov et al., 2011) and  
74 further determined the fraction of labeled supragranular layer neurons (SLN, Barone et al.,  
75 2000) as a measure of 'feedforward' versus 'feedback' projections for cortical areas.

76

77 These data answer the important question of whether the principles of interareal  
78 connectivity discovered in the macaque also apply to mouse neocortex. Unlike in other  
79 mouse connectivity studies, the distribution of FLN and SLN values we found can be  
80 directly compared to the data from macaques. At a time in which the mouse is the most  
81 widely used model system in neuroscience, it is becoming more relevant to link  
82 quantitative findings on rodent brain networks and function to the extensive work in  
83 primates.

## 84 **Materials and Methods**

85 All experiments were performed in agreement with European Communities Council  
86 Directive of November 24, 1986 (86/609/EEC), the Veterinary Office of Zurich guidelines  
87 under Licence No. 16/2010 to K.A.C. Martin and in accordance with the Basel Declaration  
88 principles. Seven young adult male C57BL/6 mice (B6CBAF1/OlaHsd (C57BL/6 x CBA),  
89 Harlan lab, Netherlands) were used for this study, five for virus injections and two for BDA  
90 injections. The adeno-associated virus AAV2/5.CMV.EGFP encoding enhanced green  
91 fluorescent protein (EGFP) was purchased from Penn Vector Core, Pennsylvania. The  
92 glycoprotein-deleted rabies virus encoding the red fluorophore mCherry [SAD $\Delta$ G-mCherry]  
93 (Marshel et al., 2010) was a generous gift from Botond Roska, Friedrich Miescher Institute  
94 for Biomedical Research, Basel, Switzerland (Yonehara et al., 2011).

## 95 **Surgical procedures and perfusion**

96 After induction of anaesthesia with 4 % isoflurane in 100 % oxygen, the mouse was fixed  
97 through a lidocaine-covered mouthpiece and prepared for stereotaxic surgery. During the  
98 surgery, the isoflurane level was reduced to 2-3 % and the body temperature of the mouse  
99 was monitored and maintained at 37 °C. From the Paxinos and Franklin atlas (Paxinos  
100 and Franklin, 2001), the coordinates for the left primary auditory cortex (Au1), were chosen  
101 to be 2.9 mm posterior and 4.1 mm lateral in relation to Bregma and the injection pipette  
102 was positioned at an angle of 30 degrees from the horizontal axis. A distinct Y-shaped  
103 blood vessel immediately posterior to Au1 served as an additional reference point for the  
104 injection site. The location of injection was later confirmed in histological sections.

105

106 Mice were injected with rabies virus or a mixture of adeno-associated virus (AAV, 1/4 to 1/3  
107 of the virus mixture) and rabies virus (3/4 to 2/3 of the virus mixture) or with biotinylated

108 dextran amine (BDA, MW 10000, Invitrogen) through a micro-pipette of 10-20  $\mu\text{m}$  inner tip  
109 diameter. AAV was used to identify the maximum extent of the injection site, and rabies as  
110 the tracer, which retrogradely labels neurons with terminals in the injection site. The exact  
111 titer of the rabies virus was unknown; but it is expected to have been up to  $10^{10}$  infectious  
112 units per ml (Wickersham et al., 2010). A volume of 100-200 nl of the virus mixture was  
113 injected via a glass pipette by pressure. In mice 1 and 2 the injection site was centered in  
114 layer 4 and 5, but all layers (except the deepest part of layer 6) were labeled. In the other  
115 mice small volumes were injected ca. every 200  $\mu\text{m}$  to label more evenly the whole depth  
116 of Au1. A second set of mice were injected iontophoretically with BDA-MW10000 dissolved  
117 1:50 in electrophoretic solution (0.2 M KCl, 0.05 M Tris Base, pH 7.9) instead of with virus.  
118 We started injecting (2-3  $\mu\text{A}$ ; 5 s on, 5 s off) at ca. 800  $\mu\text{m}$  depth and moved up 100  $\mu\text{m}$   
119 every 2 min, so the total injection time was about 20 min. Post-injection, the mice were  
120 kept for 7 to 10 days to allow for the spread of the viruses and the expression of the  
121 fluorescent proteins. BDA-injected mice recovered for 2 weeks.

122

123 The mice injected with rabies were then transcardially perfused under deep anesthesia  
124 (100 mg/kg sodium pentobarbital administered intraperitoneally). After 0.1 ml heparin  
125 (10 % in Ringer solution) was injected into the left ventricle of the heart to prevent blood  
126 clotting, the brain was perfused with saline (0.9 % NaCl), followed by 4 % paraformaldehyde  
127 (PFA, 200-300 ml in total). The brain was removed and kept in 0.1 M phosphate buffer (pH  
128 7.4) overnight or in 4 % PFA until further processing. The BDA-injected mice were  
129 perfused with 4 % PFA, 15 % picric acid and (freshly added) 0.8 % glutaraldehyde,  
130 followed by a sucrose-gradient (10 %, 20 % and 30 % sucrose) perfusion. Then the brains  
131 were sunk in 30 % sucrose.

## 132 **Preparation for microscopy**

133 The fixed brains were embedded in 2 % agarose. For the fluorescence microscopy, the  
134 coronal sections of 60  $\mu\text{m}$  thickness were cut with a Microm HM 650 V vibratome. BDA+  
135 brains were freeze-thawed (i.e. held in a plastic beaker which was dipped in liquid nitrogen  
136 until the brain was completely white and then transferred quickly to 0.1 M phosphate  
137 buffer) and coronal sections were cut at 80  $\mu\text{m}$ . The 60  $\mu\text{m}$  sections were stained for NeuN  
138 (neuronal nuclei), which also labels neuronal cell bodies (Mullen et al., 1992), in order to  
139 determine the cortical layers and areal borders. The following protocol was used: Blocking  
140 and permeabilisation in 2 % PB-Tx (2 % TritonX-100 in 0.1 M phosphate buffer) with 10 %  
141 horse serum for 2 h at room temperature, followed by incubating the sections in the  
142 primary antibody mouse- $\alpha$ -NeuN (Millipore, MAB377, AB\_2298772) diluted 1:500 at 4 °C  
143 for 2 days. The sections were then incubated with the secondary antibody donkey- $\alpha$ -  
144 mouse-AlexaFluor488 (Invitrogen, A-21202, AB\_2535788, mice 1 and 3 to 5) or donkey- $\alpha$ -  
145 mouse-AMCA (aminomethyl-coumarin acetate, Jackson, 715-155-151, AB\_2340807,  
146 mouse 2), diluted 1:500 for 6 h or overnight at 4 °C. Between antibody incubations, the  
147 sections were washed with 0.4 % PB-Tx, after the incubation with secondary antibody, the  
148 washes were done with PB only.

149

150 The BDA sections were washed in TB pH 8 (Tris buffer, 6.06 g Trizma.HCl and 1.36 g  
151 Trizma.Base in 1 l ddH<sub>2</sub>O). To visualize the BDA, the ABC kit (Avidin and Biotinylated  
152 horseradish peroxidase macromolecular Complex kit, Vector Lab) was applied. The  
153 sections were then incubated in 0.6 %  $(\text{NH}_4)_2\text{Ni}(\text{SO}_4)_2 \cdot 6 \text{H}_2\text{O}$  (ammonium Ni(II) sulfate  
154 hexahydrate) and 0.015 % DAB (3,3'-Diaminobenzidine) in TB pH 8 for 20 min. The  
155 catalyst  $\text{H}_2\text{O}_2$  was added (to a final concentration of 0.005 %) and the reaction stopped  
156 after 3-5 min with the last washes in PB. The sections were mounted with DAPI (4',6-

157 diamidino-2-phenylindole, Vectashield mounting medium, H-1200, AB\_2336790) onto  
158 slides for microscopy. (The AMCA-stained sections were mounted without DAPI because  
159 of the overlap in the emission frequencies of both fluorophores).

160

161 The BDA sections were mounted on gelatine-coated slides, air-dried and stained with  
162 Neutral red or Cresyl violet. For the staining, the sections were dehydrated and rehydrated  
163 in ascending and descending ethanol series. The tissue was incubated in Neutral red or  
164 Cresyl violet for ca. 7 min. Then followed a second dehydration series involving a  
165 differentiation step in 95 % ethanol acidified with acetic acid (ca. 1 %). After additional  
166 15 min in 100 % ethanol, the sections were transferred to xylene and finally mounted with  
167 DPX. Overview micrographs of the sections were taken at 1.25x magnification and  
168 micrographs for counting and attribution to cortical layers and areas were taken at 10x  
169 magnification with a Leica DMRB fluorescence or light microscope and at 20x with a Zeiss  
170 Mirax Midi Slide Scanner.

## 171 **Analysis**

172 The BDA-labeled brains were used for a qualitative comparison with the modified rabies  
173 virus label. The labeling pattern was very similar between the two tracers, but the BDA  
174 labeling was far sparser and only animals labeled with the more sensitive modified rabies  
175 tracer were analyzed quantitatively. The labeled cells were counted manually under the  
176 microscope and assigned to the corresponding areas based on the 10x and 20x  
177 micrographs. The identification of different cortical areas was based on detailed  
178 cytoarchitectonic characterization using the description of Caviness (1975) and the mouse  
179 brain atlas of Paxinos and Franklin (2001). The first step was to mark the boundaries of  
180 cortical layers based on cell density and soma size using the NeuN labeling. We used  
181 NeuN staining in addition to DAPI since it provides a clearer definition of layer and area



182 borders, comparable to the Nissl staining. Boundaries were marked for every area of every  
183 section where a labeled cell was found, as well as in adjacent sections in order to confirm  
184 consistency of layer location. When cells were found exactly on layer boundaries, they  
185 were assigned to the lower layer in even sections and to the upper layer in odd sections.  
186 The boundaries between all cortical areas were then manually identified for each section in  
187 each animal by careful examination of the changes in cell densities and cortical layer  
188 thickness (as in Caviness, 1975).

189

190 Subcortical cells were mostly aligned to the mouse atlas, as the area boundaries could not  
191 always be determined cyto-architectonically. While functional or tracing methods offer the  
192 possibility of an even finer subdivision of cortical areas (e.g. Stiebler et al., 1997; Tsukano  
193 et al., 2015, for auditory cortex; and Wang and Burkhalter, 2007; Garrett et al., 2014, for  
194 visual cortex), they cannot offer the comprehensive assignment of every cell to a known  
195 location that can only be achieved with the classical cytoarchitectonic method.

196

197 Images taken with the Zeiss Mirax Midi Slide Scanner were exported with program  
198 PannoramicViewer. The different channels of the fluorescence micrographs were overlaid  
199 and brightness and contrast adjusted using GIMP (GNU image manipulation program,  
200 <http://www.gimp.org>, RRID: SCR\_003182) or Adobe Photoshop CS6 ([https://www.adobe](https://www.adobe.com/products/photoshop.html)  
201 [.com/products/photoshop.html](https://www.adobe.com/products/photoshop.html), RRID: SCR\_014199). Using the Fiji plug-in TrakEM2 (Fiji,  
202 <http://fiji.sc>, RRID: SCR\_002285, TrakEM2, <https://www.ini.uzh.ch/~acardona/trakem2>  
203 [.html](https://www.ini.uzh.ch/~acardona/trakem2), RRID: SCR\_008954, Cardona et al., 2012), the micrographs of the labeled cells  
204 were manually aligned to the coronal sections of the mouse atlas and the volumes of the  
205 injection sites (i.e. the spread of the AAV) was measured. The number of cells per area  
206 and cortical layer was listed in a LibreOffice table, which was converted into a csv file. The

207 data were then analyzed and graphed with Matlab (Mathworks, [https://ch.mathworks.com/](https://ch.mathworks.com/products/matlab.html)  
208 [products/matlab.html](https://ch.mathworks.com/products/matlab.html), RRID: SCR\_001622) or depicted with Adobe Illustrator CS6  
209 (<https://www.adobe.com/products/illustrator.html>, RRID: SCR\_014198) and Photoshop,  
210 respectively.

211

212 The fraction of labeled neurons (FLN, Markov et al., 2011) equals the fraction of labeled  
213 cells in a source area divided by the total number of labeled cells in the whole brain in  
214 percent. The extrinsic fraction of labeled neurons (FLNe, Markov et al., 2011) is the  
215 fraction of labeled cells in a source area divided by the total number of labeled cells  
216 excluding the injection site areas Au1 and AuV of the left hemisphere. For cortical areas,  
217 the fraction of labeled supragranular layer neurons (SLN, Barone et al., 2000) was  
218 calculated by dividing the number of neurons in layers 1-4 over the number of all labeled  
219 neurons in this area.

220

$$221 \quad FLN = \frac{\text{number of labeled cells in a source area}}{\text{total number of labeled cells in the brain}} \cdot 100 \%$$

222

$$223 \quad FLNe = \frac{\text{number of labeled cells in a source area}}{\text{total number of labeled cells in the brain except in left Au1 and AuV}} \cdot 100 \%$$

224

$$225 \quad SLN = \frac{\text{number of labeled cells in the supragranular layers of a source area}}{\text{total number of labeled cells in the source area}}$$

## 226 Results

227 To obtain the complete input map of neurons connecting to Au1 from both hemispheres,  
228 single pressure injections of modified rabies virus together with AAV were made in Au1 of  
229 the left hemisphere in five mice. The location of the injection was confirmed in histological  
230 sections labeled with NeuN using cytoarchitectonical features to identify Au1. The  
231 injection sites were clearly visible under the epifluorescence microscope and confirmed  
232 that the modified rabies was injected through all layers of Au1 (see Figure 1A+B). The  
233 injection site volumes and locations were comparable between animals. The average  
234 injection site volume was  $0.70 \pm 0.19 \text{ mm}^3$  and the virus reached a depth of approximately  
235 0.9 mm (cortical depth of Au1 was 1 mm). At the center of the injection site, the distance  
236 from the rhinal fissure along the cortical surface to the center of the injection site was  
237  $1.44 \pm 0.05 \text{ mm}$ , which corresponded to a very consistent  $20.3 \pm 0.2 \%$  of the total  
238 distance from rhinal fissure to the midline in each brain. Examples of coronal sections  
239 containing labeled neurons (in magenta) and stained for NeuN (in green) for cyto-  
240 architectonic identification of cortical areas are shown in Figure 2A. Note the relatively  
241 dense labeling in the ipsi- and contralateral auditory cortices and in the medial geniculate  
242 nucleus of the thalamus, as well as distributed label in association cortical areas, and  
243 rhinal, visual, somatosensory and motor cortex.

244

245 Figure 1A+B shows an injection site of the viruses nine days after the injection. We co-  
246 injected AAV because after the long survival times we found that the rabies was far less  
247 visible at the injection site, which made the limits of the rabies injection difficult to  
248 demarcate. The extent of the rabies was confined to Au1, but the AAV filled most of Au1  
249 and a portion of the secondary auditory cortex, AuV, which lies more ventrally. It was thus  
250 possible that some of the rabies particles had also reached the AuV and therefore we were

251 conservative and assumed that the injection site included both Au1 and AuV. Thus when  
252 referring to projections to Au1, we implicitly include AuV. In one animal the tip of the pipette  
253 touched the hippocampus immediately below Au1, and the modified rabies labeled  
254 hippocampal neurons and possibly also a few of the projections to area CA1. This animal  
255 was excluded from the final quantitative analysis, although the pattern and weights of  
256 inputs to Au1 – after taking into account the intra-hippocampal connections – was similar  
257 to the brains where the injection was confined to the neocortex. In another animal, the  
258 injection labeled a small total number of neurons (ca. 1000), The major input sources of  
259 Au1 were the same as in the larger injections, but the numbers were too few to provide  
260 accurate counts and this was excluded from the quantitative analysis.

#### 261 **Fraction of labeled neurons in extrinsic sources (FLNe)**

262 The size of the pressure injection site was relatively large and covered more than half the  
263 volume of Au1, so although the fraction of labeled cells in Au1 was  $26.5 \pm 1.1\%$  of all  
264 labeled cells, this is likely to be an underestimate since we excluded cells within or at the  
265 border of the injection site that might have taken up the virus directly through their soma or  
266 dendrites. Thus to calculate the weights of the projections, we excluded the labeled neuron  
267 in Au1 and AuV and expressed the counts as a 'fraction of labeled neurons extrinsic'  
268 (FLNe), as a proportion of total labeled cells in the surrounding brain areas (Markov et al.,  
269 2011). The FLNe provides a simple measure of the numerical 'weight' of the many  
270 projections to Au1/AuV. The averaged FLNe values for the three mice were ranked by  
271 magnitude and plotted on a log axis (Figure 1C).

272

273 Thirty-four of the 47 neocortical areas identified contained neurons projecting to Au1.  
274 These areas were identified based on their cytoarchitectonic properties in NeuN-stained  
275 sections (see Methods for details). The most prominent labeling occurred in the auditory

276 cortices (Figure 1C). The ipsilateral AuD (secondary auditory cortex, dorsal part) was the  
277 most densely labeled cortical area with an FLNe of  $12.7 \pm 5.7$  % (i.e. mean  $\pm$  standard  
278 deviation). The ipsilateral temporal association cortex (TeA, FLNe  $7.5 \pm 4.2$  %) provided  
279 major projections to Au1/AuV. Although TeA is the association cortex that is physically  
280 closest to the auditory cortex, it was not the only association area to provide input to  
281 Au1/AuV, since the parietal association cortex (LPtA, MPtA, FLNe  $0.08 \pm 0.12$  %) and  
282 even the distant frontal association cortex (FrA, FLNe  $0.04 \pm 0.06$  %) projected to Au1.

283

284 A striking finding was the high degree of direct cross-modal projections to Au1, both in  
285 terms of projection weight and number of areas involved. The visual cortices were highly  
286 connected with Au1/AuV, having a cumulative FLNe of  $3.3 \pm 1.5$  %. The lateral secondary  
287 visual cortex (V2L) contributed the biggest part, while the primary visual cortex (V1) and  
288 the medial secondary visual cortices (V2MM, V2ML) contributed less than 1 % each. Other  
289 sensory modalities formed weaker projections. The somatosensory cortex (primary and  
290 secondary) had a cumulative FLNe of  $1.2 \pm 1.0$  %. Although the secondary somatosensory  
291 cortex (S2) provided a stronger projection than the primary somatosensory cortex (S1),  
292 labeled neurons were spread across the whole somatotopic representation in the primary  
293 somatosensory cortex (S1, S1BF, S1HL, S1Sh and S1Tr), with the barrel field (S1BF)  
294 being the strongest of these.

295

296 The olfactory system was also linked to the auditory cortex via a direct projection from the  
297 olfactory association cortex or piriform cortex (Pir, FLNe  $0.09 \pm 0.06$  %), which is part of  
298 the three-layered archicortex. Weak projections also originated from the gustatory or  
299 insular cortex. Both granular and agranular parts of the insular cortex contained labeled  
300 neurons, but none of these regions were labeled in all animals, which is reflected in the

301 low FLNe values (GI, DI and AIP, cumulative FLNe  $0.11 \pm 0.10$  %).

302

303 The Au1/AuV not only received input from sensory cortical areas, but also from the primary  
304 and secondary motor cortex (M1, M2, FLNe  $0.39 \pm 0.08$  %). These projections did not  
305 involve large numbers of neurons, but they were seen consistently in all brains. Moreover,  
306 the rhinal cortices of the parahippocampal region were the source of a substantial input to  
307 Au1. These regions included the ectorhinal cortex (Ect), lying on the ventral border of the  
308 temporal association cortex (TeA), and successively the areas of perirhinal (PRh) and  
309 lateral (LEnt) and medial (MEnt) entorhinal cortex. Altogether, the FLNe of the rhinal cortex  
310 was  $1.7 \pm 0.8$  %. Sparser projections originated in the medial cortices: the cingulate and  
311 retrosplenial cortex had a cumulative FLNe of  $0.32 \pm 0.42$  %. The labeling in the  
312 retrosplenial cortex (RSA and RSG, also called the posterior cingulate cortex), was denser  
313 than the labeling in the transition zone Cg/RS and in the cingulate cortex (or anterior  
314 cingulate cortex, Cg1 and Cg2). Also associated with the limbic system, the orbital cortex  
315 sent a weak connection to the auditory cortex. Lateral (LO), ventral (VO) and dorsolateral  
316 (DLO) orbital cortex contributed  $0.05 \pm 0.09$  % to the total FLNe.

317

318 Most of the same cortical areas labeled in the ipsilateral cortex were also labeled in the  
319 contralateral cortex, but with a much smaller weight. The total FLNe of the contralateral  
320 cortex was  $14.3 \pm 3.4$  %, whereas the FLNe of the ipsilateral cortex  $27.4 \pm 6.0$  %. Note  
321 that the ipsilateral FLNe is an underestimate because the local intra-areal input around the  
322 injection site could not be included in this calculation. For single areas, the projection from  
323 the corresponding area in the contralateral cortex was in most cases much weaker. This  
324 difference in input weight between hemispheres was especially evident in areas with a  
325 relatively high ipsilateral FLNe value; the contralateral AuD, for instance, provided a ten-

326 fold weaker projection than the ipsilateral AuD. Eighteen cortical areas were labeled in the  
327 contralateral hemisphere and involved areas of the auditory, visual and somatosensory  
328 modality, motor and association cortex as well as rhinal cortex (Figure 1C; Figure 2B).  
329 Subcortical labeling, however, was very sparse in the contralateral hemisphere. Only three  
330 nuclei were labeled with 1 or 2 cells each, whereas on the ipsilateral side, labeled neurons  
331 were found in 63 different subcortical nuclei. These were mostly concentrated in the  
332 auditory thalamus, but spread as far as the cortical subplate and the deep midbrain.  
333 Overall, the FLNe from ipsilateral subcortical areas was  $58.3 \pm 3.3$  %. Relatively strong  
334 projections were found from the basal ganglia, including the striatum (caudate/putamen,  
335 CPu, FLNe  $1.44 \pm 0.65$  %), globus pallidus (LGP, MGP, FLNe  $3.6 \pm 1.1$  %), substantia  
336 nigra and subthalamic nucleus. Of these areas, the lateral globus pallidus (LGP) had the  
337 most labeled cells, followed by CPu.

338

339 In the mice we injected with BDA, we also found widespread anterogradely labeled fibers  
340 in the caudate putamen and the lateral globus pallidus. In the mouse with a bigger BDA  
341 injection, there were also a few retrogradely labeled cell bodies inside these areas, but  
342 mostly close to the surrounding brain areas. Also some of the rabies-positive cells in the  
343 caudate putamen and the lateral globus pallidus were close the transition zones to the  
344 amygdala or the basal forebrain, but in addition many of the rabies-positive cells were  
345 clearly inside the striatum and pallidum. In contrast to the BDA-labeled axons, even the  
346 rabies-positive cells were restricted to the dorsal part of the pallidum and striatum, thus  
347 calling the connection between caudate putamen / globus pallidus and Au1 'reciprocal'  
348 may not be strictly correct.

349

350 Other areas linked to the basal ganglia had a few labeled cells, namely the zona incerta

351 (ZI) and the reticular thalamic nucleus (Rt). The zona incerta splits into a dorsal (ZID) and  
352 a ventral (ZIV) part, which are easily distinguishable as two parallel beams of cells in a  
353 coronal section. Together with the subincertal nucleus (SubI), the FLNe of the zona incerta  
354 was  $0.18 \pm 0.22$  %.

355

356 Several nuclei of the basal forebrain projected to Au1, with a cumulative FLNe of  
357  $0.3 \pm 0.1$  %. They included the substantia innominata (SI), the basal nucleus (B) and the  
358 horizontal limb of the diagonal band (HDB). Of these areas, the substantia innominata was  
359 consistently labeled in all animals. Labeled areas in the cortical subplate involved the  
360 endopiriform cortex (VEn) and the claustrum (CI), which projected to Au1/AuV from both  
361 hemispheres. With a cumulative FLNe of  $0.08 \pm 0.04$  %, these projections were of a low  
362 weight.

363

364 Although the thalamus is expected to be one of the main input sources of a primary  
365 cortical area such as Au1, the projections from the thalamus were surprisingly numerous  
366 and together constituted close to half of the total extrinsic projection weights, i.e.  
367  $48.6 \pm 3.8$  % of the FLNe. The main contributor was the ventral medial geniculate nucleus  
368 (MGV – the auditory thalamus) with an FLNe of  $35.5 \pm 6.7$  %. Surrounding this dense  
369 cluster of retrogradely labeled neurons, the other nuclei of the medial geniculate body  
370 (MGD, MGM, MZMG, SG) contributed  $11.2 \pm 4.4$  % to the FLNe. The labeling in the  
371 thalamus extended beyond the medial geniculate body to various nuclei of the ventral,  
372 lateral and posterior thalamus. These thalamic nuclei typically had a projection weight of  
373 less than 0.3 %. In total, including the five areas of the medial geniculate body, 26 thalamic  
374 nuclei were labeled.

375



376 The midbrain also provided a number of projections. The most prominent of these was  
377 from the inferior colliculus (BIC) including the subjacent subbrachial nucleus (SubB),  
378 providing a total FLNe of  $1.8 \pm 0.7$  %. A number of neurons projecting to Au1 were located  
379 in the deep mesenchymal nucleus (DpMe, FLNe  $0.9 \pm 1.3$  %). The Au1 received direct  
380 input from nuclei known to modulate cortical activity such as the anterior pretectum and  
381 the dorsal raphe nucleus, but both areas provided a low input weight: The FLNe of the  
382 anterior pretectum (APTD, APTV, APT) amounted to only  $0.15 \pm 0.16$  % and the dorsal  
383 raphe nucleus (DRC) had an FLNe of  $0.01 \pm 0.02$  %. The substantia nigra, also a midbrain  
384 nucleus, sent projections from both the lateral (SNL) and the reticular (SNR) part with an  
385 FLNe of  $0.06 \pm 0.08$  %.

386

387 A small number of neurons were consistently labeled in the hippocampus (Or, Py, FLNe  
388  $0.5 \pm 0.4$  %) and the subiculum (S, PrS, FLNe  $0.14 \pm 0.17$  %). In the hippocampus the  
389 labeled neurons were mainly in the CA1 region close to Au1 in the oriens and pyramidal  
390 cell layers. These lay some distance from the injection site, indicating they were labeled  
391 retrogradely. The labeled hypothalamic cells were distributed among four nuclei, of which  
392 the lateral hypothalamic nucleus (LH) contained most cells. The cumulative FLNe of the  
393 labeled hypothalamic nuclei (LH, DM, Te, SuMM) was  $0.14 \pm 0.11$  %. Finally, the amygdala  
394 complex was found to have a direct connection to Au1: from the anterior (AAD, AAV) and  
395 basomedial (BMP) amygdaloid nuclei as well as from the amygdalostriatal transition area  
396 (AStr). The FLNe of the amygdala was  $0.08 \pm 0.03$  %, indicating a weak projection.

397

398 Across the whole brain, the FLNe spanned four orders of magnitude (Figure 1C). Areas  
399 with high FLNe values were consistently labeled in all mice. This was typically the case for  
400 FLNe values above 0.18 %, with two exceptions (DpMe and ic: internal capsule). Low

401 FLNe values did not necessarily mean that the projections were variable, since several  
402 sources with an FLNe below 1 % were found in all mice, most notably the projection from  
403 the ipsilateral claustrum (FLNe 0.06 %). The strongest connection that was found only in  
404 one animal (from PLi, posterior limitans thalamic nucleus: FLNe 0.08 %) had a similar  
405 weight.

406

407 Of all the 98 areas with an observed projection to Au1, 30 were labeled in all animals and  
408 had a cumulative FLNe projection weight of approximately 96 %. Thirty-two areas were  
409 only found labeled in one animal. Most of these projections originated in subcortical areas  
410 and they typically contained only 1-2 cells per area. The cumulative FLNe of these  
411 uniquely labeled areas was less than 1 %.

412

413 Distance effects were clearly in evidence: the closer a cortical area was to Au1, the more  
414 labeled neurons it contained. For the ipsilateral cortex, the relationship of the FLN to the  
415 distance between the center of a projecting area and the injection site is plotted in Figure  
416 1D. There was a correlation between the projection weights of the ipsilateral cortical areas  
417 and the distance of their centers to the center of Au1, but the rule is not absolute. Motor  
418 cortex (M2), for example, sends a stronger projection to Au1 than would be expected from  
419 its distance. Also the local input is well above the regression curve, while entorhinal  
420 cortices (LEnt, MEnt) and primary somatosensory cortices (S1, S1Sh, S1BF) show weaker  
421 connections than expected. Nonetheless, this distance effect is reflected in the fact that  
422  $89.0 \pm 5.0$  % of all labeled cells of the same cortical hemisphere were found within about  
423 1 mm of the injection site. All these labeled cells lay in the four cortical areas closest to the  
424 injection site (Au1, AuV, AuD and TeA), whose centers were within 1 mm of the injection  
425 site. This shows the existence of a dense connectivity to areas around the auditory cortex

426 and many sparse long-distance projections arising from all over the cortex in both  
427 hemispheres. The binary connection density of the ipsilateral cortex amounted to 72 % (34  
428 out of 47 possible cortical areas were connected to Au1). The longest of these connections  
429 were about 7 mm, and originated from the ventral orbital (VO) and the frontal association  
430 (FrA) cortex (Figure 1D).

### 431 **Fraction of supragranular layer neurons in cortex (SLN)**

432 The fraction of supragranular layer neurons (SLN) relative to all labeled neurons in a given  
433 area (see Methods) was calculated for all cortical areas. These values provide a means of  
434 ranking areas according to whether they were predominantly feedforward, lateral, or  
435 feedback relative to Au1 (see Barone et al., 2000). Here we found that Au1 received  
436 predominantly feedback connections (SLN < 0.33) from areas like visual, somatosensory,  
437 motor and rhinal cortex (see Figure 1E). This was also the case for primary  
438 somatosensory, insular and cingulate cortex, although the variability in the SLN of these  
439 areas was high due to the small numbers of labeled cells. Even in the piriform cortex, most  
440 labeled neurons were in the deepest layer, in layer 3, and it was thus classified as a  
441 'feedback' area. Interestingly, SLN values in the midrange – between 0.33 and 0.66 – were  
442 common. Such values indicate 'lateral' projections, which arose from areas like the  
443 ipsilateral auditory cortex, the ipsilateral TeA and V2L, and from TeA, Au1 and AuV of the  
444 contralateral cortex (homotopic to the injection site). Other areas with an SLN around 0.5  
445 (e.g. Cg1, LPtA, MPtA) were typically represented with few labeled cells and we interpret  
446 these SLN values with caution. The same caution applies to areas with an SLN of 1, where  
447 only a few labeled superficial layer neurons were found (AIP, S1Sh and DLO). With these  
448 exceptions, there were no projections with an SLN between 1 and 0.6, indicating that no  
449 cortical area was feedforward to Au1, as one might expect for a primary sensory area. On  
450 the other hand, the range of feedback and lateral projections (SLN between 0 and 0.5)

451 was well-covered. Generally, the SLN did not differ substantially between the hemispheres,  
452 except that the proportion of labeled layer 5 cells tended to be higher in the contralateral  
453 hemisphere, at the expense of layer 6 cells. But this trend was obviously not reflected in  
454 the SLN. The data and analyses are given in a single comprehensive summary diagram  
455 (Figure 2B), which includes both the SLNs and the FLNs of the network that provides the  
456 many inputs of Au1/AuV.

## 457 **Discussion**

458 Our analyses revealed that there are direct projections to Au1 from 98 brain areas of the  
459 mouse. The auditory cortex and the auditory thalamus provided the main weight in terms  
460 of numbers of projecting neurons, but the visual cortices, the temporal association cortex  
461 and the basal ganglia contributed substantially to the total input. Low-weight connections  
462 were found from almost every cortical area, the hippocampal formation, from many  
463 distributed nuclei in the basal forebrain, the hypothalamus, some nuclei of the thalamus,  
464 and the midbrain. Although the FLNe values varied between animals, the main inputs to  
465 Au1 were consistent. Large standard deviations were seen in areas with lower weights,  
466 simply because such areas did not contain labeled neurons in all animals. Inter-animal  
467 differences may be due to slight differences in the size and/or location of the injection site,  
468 or to actual connection weight differences between individuals.

## 469 **Comparison with other mouse connectome studies**

470 The Allen Brain Institute has investigated mouse brain connectivity on a grand scale using  
471 recombinant AAV as an anterograde tracer (Oh et al., 2014). We searched this database  
472 (<http://connectivity.brain-map.org/>) for the brain areas where we found retrogradely labeled  
473 cells and checked if injection of AAV into these areas had resulted in anterograde axon  
474 labeling in Au1. Indeed almost all projections to Au1 were confirmed in wildtype C57BL/6J  
475 mice. Only a few areas that we found to project to Au1 were either not injected with AAV  
476 (e.g. FrA, MGP, SNL, fiber tracts) or could not be distinguished from nearby areas due to  
477 the injection size or precision (e.g. Cg/RS, MPtA, SubB, lateral thalamic nuclei, ZID, ZIV,  
478 TC, hippocampal layers, several amygdaloid nuclei).

479

480 A similar pattern of cortical sites projecting to Au1 is evident in the iConnectome map

481 (<http://www.mouseconnectome.org/>), which is another growing database of mouse  
482 connectivity based on co-injections of anterograde and retrograde tracers (Zingg et al.,  
483 2014). Our findings agree with the high degree of connections between sensory modalities  
484 described in Zingg and colleagues' (Zingg et al., 2014) medial sub-network of the mouse  
485 cortex. Additionally, we found direct projections from the lateral sub-network (piriform and  
486 insular cortex) to Au1, implying that these sub-networks do not operate independently.

487

488 The existence of direct projections from the caudate putamen and globus pallidus to the  
489 neocortex has been disputed (see e.g. Divac et al., 1987), but consistent with our  
490 observations, the Allen brain atlas (<http://connectivity.brain-map.org/>) recorded that sparse  
491 anterograde labeling was indeed present in all layers of the ipsilateral Au1 and mostly in  
492 deep layers 5 and 6 in a mouse brain with AAV injection in the dorsal part of the caudate  
493 putamen. Interestingly, retrograde tracer studies in the cat point to the auditory cortex as  
494 one of the main targets of direct connections from striatum and pallidum to neocortex  
495 (Jayaraman, 1980; Oleshko and Maisky, 1993). Although some cells in the pallidum that  
496 project to the neocortex might be interpreted as belonging to a cell population of  
497 neighboring brain areas (Divac et al., 1987), this does not hold in all cases. In the rat for  
498 instance, a separate population of small globus pallidus neurons projecting to the frontal  
499 cortex was described that was distinct from the larger cholinergic cells along the  
500 boundaries of the globus pallidus (Van Der Kooy and Kolb, 1985). In the mouse, a similar  
501 picture emerges: After small tracer injections, only one-directional connections from the  
502 neocortex to the striatum were reported for the ultrasonic field of Au1 (Hofstetter and  
503 Ehret, 1992).

504

505 The iConnectome study was performed using conventional retrograde tracers (Cholera

506 toxin B, Fluorogold), so the similarity in pattern of label suggests that the rabies virus is  
507 taken up by the same population of axons. The major advantage of the rabies viral tracers  
508 over other retrograde tracers is its sensitivity, but the negative aspect of virus tracing  
509 compared to conventional tracers is its cytotoxicity. We used the less cytotoxic AAV virus  
510 to give us an estimate of the likely maximum extent of the modified rabies uptake zone.  
511 Since the AAV reached the AuV ventral of the main injection site into Au1, we cannot  
512 completely exclude the possibility that some of the labeled cells also project to AuV. The  
513 dense labeling in the MGv, which mainly targets the primary auditory cortex (Winer et al.,  
514 1999), indicates that the rabies virus was largely confined to Au1.

### 515 **Comparing species**

516 We found a lower proportion of labeled neurons (26.5 %) within Au1 than was reported for  
517 cat Au1 (60 %, Lee and Winer, 2011) or macaque visual cortex (80 %, Markov et al., 2011).  
518 This difference is likely due to the fact that the size of the injection site was large relative to  
519 the size of Au1 in the mouse. A different trend was observed for the main thalamic input,  
520 where we found 35.5 % of extrinsic projections coming from the MGv alone. The same  
521 projection in the cat was determined to be 18 % (Lee and Winer, 2011). Thalamic input to  
522 the macaque cortex appears to be even lower by comparison (1 % to V1, Markov et al.,  
523 2011). In the Mongolian gerbil, auditory subcortical afferents formed 27 % of the total  
524 (Budinger and Scheich, 2009) , compare the 43 % we found in the mouse.

525

526 Overall, the range of FLNe values spanned four orders of magnitude in the mouse, while in  
527 the macaque it spanned five orders of magnitude (Markov et al., 2012). The FLNe of the  
528 ipsilateral cortex was exponentially dependent on physical distance: 90 % of these cells  
529 were within 1 mm to the injection site (compared to 75 % of labeled cells within ca. 1 mm  
530 and 95 % of labeled cells within ca. 2 mm of V1 in the macaque, (Markov et al., 2011)).

531 Small-world networks have been a popular graph-theoretical model of cortical networks  
532 (Watts and Strogatz, 1998; Bullmore and Sporns, 2009; Budd and Kisvarday, 2012). The  
533 typical features of such networks, viz. high local clustering and short path lengths due  
534 sparse long-range connections, optimize the integration and segregation of information  
535 and have been seen as suitable description for cortical networks. However, the high binary  
536 connectivity found in the long distance connections in macaque (66 %, Markov et al.,  
537 2012) and in the mouse (72 %) cortex is inconsistent with that of a classical small-world  
538 architecture, as emphasized by Markov and Kennedy (2013).

### 539 **Cortical hierarchy**

540 The SLN provides an index of hierarchical distance (Markov and Kennedy, 2013). ‘Lateral’  
541 connections, which indicate that the areas lie at the same level of the hierarchy (SLN  $\approx$   
542 0.5), may thus have been expected from auditory cortices and even from ipsilateral V2L  
543 and V1, but surprisingly, the association area TeA (of both hemispheres) also connected to  
544 Au1 in a lateral fashion. As in the macaque, the immediately neighboring areas of Au1 had  
545 SLN values around 0.5. The SLN gradually declined for the more distant areas (Ect, V1,  
546 S2), but did not correlate with physical distance. Anterograde tracing with AAV virus from  
547 these areas providing lateral connections shows very sparse projections to Au1  
548 (<http://connectivity.brain-map.org>). The axons innervate all layers, but are particularly  
549 sparse in layer 4. This projection pattern is evident even if only neurons in superficial  
550 layers or in layer 5 expressed the fluorescent label in a Cre-dependent manner (see  
551 <http://connectivity.brain-map.org>).

552

553 Long-distance feedforward paths from cortical areas to Au1 were notably absent, while  
554 feedback connections (from rhinal, insular, visual, somatosensory, motor and cingulate  
555 cortex) dominated. By contrast, after injections of a Cre+ pseudotyped lentivirus into the



556 auditory cortex of transgenic (Cre-dependent tdTomato-expressing) mice, Nelson and  
557 colleagues found that retrogradely labeled cell bodies were located preferentially in  
558 superficial layers of M1 and distributed over superficial and deep layers of M2 (Nelson et  
559 al., 2013). In that same study, however, anterogradely labeled axons in Au1 terminated  
560 mainly in layers 1 and 6, which is a typical feedback pattern according to the criteria  
561 formulated by Felleman and Van Essen (Felleman and Van Essen, 1991). An attempt to  
562 reconcile these findings with our results may be the different sensitivity of the viral tracers  
563 used or the fact that Nelson and colleagues injected more dorsally in the auditory cortex.  
564 While cortical feedforward connections were mostly absent, the primary thalamic  
565 feedforward projection from the MGv had a very large FLNe (approximately 35 %).  
566 Together with the finding that thalamic axons target proximal dendrite segments  
567 (Richardson et al., 2009), our results suggest that in the rodent Au1 cortical processing is  
568 primarily feedforward-driven. This is in sharp contrast to the picture that has emerged from  
569 the cat and primate visual cortex, where thalamic input is a very small fraction  
570 (approximately 1 %) of all the excitatory input.

### 571 **Functional implications**

572 Our results indicate that the auditory cortex is not the monosensory area its name implies,  
573 but that multimodal integration could occur even at this early stage of cortical processing.  
574 Multisensory integration is widespread in the neocortex (Schroeder et al., 2003; Clavagnier  
575 et al., 2004; Ghazanfar and Schroeder, 2006; Budinger and Scheich, 2009) and the  
576 connection between auditory and visual cortex has received particular attention. In  
577 humans, striking illusions like the McGurk effect demonstrate the interaction of auditory  
578 and visual information to form a consistent percept (McGurk and MacDonald, 1976). In the  
579 mouse, the projection from V2L was shown to modulate Au1 activity (Banks et al., 2011),  
580 but what role this visual feedback plays in auditory perception is still unclear. Activity in the

581 monkey auditory cortex is suppressed before and during certain movements, like those  
582 involved in vocalization (e.g. Müller-Preuss and Ploog, 1981; Eliades and Wang, 2003).  
583 This motor-auditory crosstalk at the cortical level may be a crucial component of auditory  
584 processing even in the mouse, which has a rich vocal repertoire. The FLN values for many  
585 of these projections are very small, which raises the pertinent question of how these few  
586 fibers exert any significant effect in Au1. The possibilities are that they act in synchrony or  
587 form very specific connections with a subset of 'pointer' neurons that control the gain of the  
588 recurrent connections in the local microcircuit of Au1 (Douglas and Martin, 2007). The  
589 anatomical weight, as measured here in the FLN, has to be translated into a functional and  
590 dynamic projection weight, which of course may differ even between areas with the same  
591 FLN value.

## 592 **Conclusion**

593 Studies of anatomical 'hardwiring' provide valuable information about the network  
594 properties of interareal brain connections and provide a basis for interpreting the results of  
595 physiological and behavioral studies. The relative simplicity of measuring SLN and FLN  
596 provides a very powerful method of comparison between areas, systems, and species.  
597 Our quantification of input weights has revealed similarities to the macaque data in that the  
598 major cortical connections with auditory cortex come from adjacent areas. The pattern in  
599 the mouse also differs substantially from the macaque in having a much higher weight of  
600 connections from the thalamus and in receiving direct input from a larger proportion of  
601 cortical regions than is evident in the macaque. This difference may indicate constraints of  
602 processing in small brains, or adaptive specializations that are more species-specific.

### 603 **Other Acknowledgements**

604 We are indebted to Botond Roska for advice and for providing the modified rabies virus.

605 Imaging was performed with support of the Center for Microscopy and Image Analysis,

606 University of Zurich.

607

### 608 **Conflict of Interest**

609 The authors declare no competing financial interests.

610

### 611 **Role of Authors**

612 All authors were involved in all aspects of the study.

## 613 References

- Banks MI, Uhlich DJ, Smith PH, Krause BM, Manning KA. 2011. Descending Projections from Extrastriate Visual Cortex Modulate Responses of Cells in Primary Auditory Cortex. *Cereb Cortex* 21:2620–2638.
- Barone P, Batardiere A, Knoblauch K, Kennedy H. 2000. Laminar Distribution of Neurons in Extrastriate Areas Projecting to Visual Areas V1 and V4 Correlates with the Hierarchical Rank and Indicates the Operation of a Distance Rule. *J Neurosci* 20:3263–3281.
- Budd JML, Kisvarday ZF. 2012. Communication and wiring in the cortical connectome. *Front Neuroanat* [Internet] 6. Available from: <http://www.ncbi.nlm.nih.gov/pmc/articles/PMC3472565/>
- Budinger E, Scheich H. 2009. Anatomical connections suitable for the direct processing of neuronal information of different modalities via the rodent primary auditory cortex. *Hear Res* 258:16–27.
- Bullmore E, Sporns O. 2009. Complex brain networks: graph theoretical analysis of structural and functional systems. *Nat Rev Neurosci* 10:186–198.
- Cardona A, Saalfeld S, Schindelin J, Arganda-Carreras I, Preibisch S, Longair M, Tomancak P, Hartenstein V, Douglas RJ. 2012. TrakEM2 Software for Neural Circuit Reconstruction. *PLoS ONE* 7:e38011.
- Caviness VS. 1975. Architectonic map of neocortex of the normal mouse. *J Comp Neurol* 164:247–263.
- Clavagnier S, Falchier A, Kennedy H. 2004. Long-distance feedback projections to area V1: implications for multisensory integration, spatial awareness, and visual consciousness. *Cogn Affect Behav Neurosci* 4:117–126.
- Divac I, Mogensen J, Marinkovic S, Mårtensson R. 1987. On the projections from the neostriatum to the cerebral cortex: The “displaced” neurons. *Neuroscience* 21:197–205.
- Douglas RJ, Martin KAC. 2007. Recurrent neuronal circuits in the neocortex. *Curr Biol* 17:R496–R500.
- Eliades SJ, Wang X. 2003. Sensory-Motor Interaction in the Primate Auditory Cortex During Self-Initiated Vocalizations. *J Neurophysiol* 89:2194–2207.
- Ercsey-Ravasz M, Markov NT, Lamy C, Van Essen DC, Knoblauch K, Toroczkai Z, Kennedy H. 2013. A Predictive Network Model of Cerebral Cortical Connectivity Based on a Distance Rule. *Neuron* 80:184–197.
- Felleman DJ, Van Essen DC. 1991. Distributed hierarchical processing in the primate cerebral cortex. *Cereb Cortex N Y N* 1991 1:1–47.
- Garrett ME, Nauhaus I, Marshel JH, Callaway EM. 2014. Topography and Areal

Organization of Mouse Visual Cortex. *J Neurosci* 34:12587–12600.

Ghazanfar AA, Schroeder CE. 2006. Is neocortex essentially multisensory? *Trends Cogn Sci* 10:278–285.

Hofstetter KM, Ehret G. 1992. The auditory cortex of the mouse: Connections of the ultrasonic field. *J Comp Neurol* 323:370–386.

Jayaraman A. 1980. Anatomical evidence for cortical projections from the striatum in the cat. *Brain Res* 195:29–36.

Lee CC, Winer JA. 2011. Convergence of thalamic and cortical pathways in cat auditory cortex. *Hear Res* 274:85–94.

Markov NT, Ercsey-Ravasz M, Van Essen DC, Knoblauch K, Toroczkai Z, Kennedy H. 2013. Cortical High-Density Counterstream Architectures. *Science* 342:1238406–1238406.

Markov NT, Ercsey-Ravasz MM, Gomes ARR, Lamy C, Magrou L, Vezoli J, Misery P, Falchier A, Quilodran R, Gariel MA, Sallet J, Gamanut R, Huissoud C, Clavagnier S, Giroud P, Sappey-Marinier D, Barone P, Dehay C, Toroczkai Z, Knoblauch K, Essen DCV, Kennedy H. 2012. A Weighted and Directed Interareal Connectivity Matrix for Macaque. *Cereb Cortex*:bhs270.

Markov NT, Kennedy H. 2013. The importance of being hierarchical. *Curr Opin Neurobiol* 23:187–194.

Markov NT, Misery P, Falchier A, Lamy C, Vezoli J, Quilodran R, Gariel MA, Giroud P, Ercsey-Ravasz M, Pilaz LJ, Huissoud C, Barone P, Dehay C, Toroczkai Z, Essen DCV, Kennedy H, Knoblauch K. 2011. Weight Consistency Specifies Regularities of Macaque Cortical Networks. *Cereb Cortex* 21:1254–1272.

Marshel JH, Mori T, Nielsen KJ, Callaway EM. 2010. Targeting Single Neuronal Networks for Gene Expression and Cell Labeling In Vivo. *Neuron* 67:562–574.

McGurk H, MacDonald J. 1976. Hearing lips and seeing voices. *Nature* 264:746–748.

Mullen RJ, Buck CR, Smith AM. 1992. NeuN, a neuronal specific nuclear protein in vertebrates. *Development* 116:201–211.

Müller-Preuss P, Ploog D. 1981. Inhibition of auditory cortical neurons during phonation. *Brain Res* 215:61–76.

Nelson A, Schneider DM, Takatoh J, Sakurai K, Wang F, Mooney R. 2013. A Circuit for Motor Cortical Modulation of Auditory Cortical Activity. *J Neurosci* 33:14342–14353.

Oh SW, Harris JA, Ng L, Winslow B, Cain N, Mihalas S, Wang Q, Lau C, Kuan L, Henry AM, Mortrud MT, Ouellette B, Nguyen TN, Sorensen SA, Slaughterbeck CR, Wakeman W, Li Y, Feng D, Ho A, Nicholas E, Hirokawa KE, Bohn P, Joines KM, Peng H, Hawrylycz MJ, Phillips JW, Hohmann JG, Wohnoutka P, Gerfen CR, Koch C, Bernard A, Dang C, Jones AR, Zeng H. 2014. A mesoscale connectome of the mouse brain. *Nature* 508:207–214.

- Oleshko NN, Maisky VA. 1993. Topographical organization of the sources of discrete cortical projections within the striatum as determined by a retrograde fluorescence tracing technique in the cat. *Neuroscience* 57:683–695.
- Paxinos G, Franklin KBJ. 2001. *The mouse brain in stereotaxic coordinates* (Academic, San Diego). Ed.
- Richardson RJ, Blundon JA, Bayazitov IT, Zakharenko SS. 2009. Connectivity Patterns Revealed by Mapping of Active Inputs on Dendrites of Thalamorecipient Neurons in the Auditory Cortex. *J Neurosci* 29:6406–6417.
- Rockland KS, Pandya DN. 1979. Laminar origins and terminations of cortical connections of the occipital lobe in the rhesus monkey. *Brain Res* 179:3–20.
- Schroeder CE, Smiley J, Fu KG, McGinnis T, O’Connell MN, Hackett TA. 2003. Anatomical mechanisms and functional implications of multisensory convergence in early cortical processing. *Int J Psychophysiol* 50:5–17.
- Stiebler I, Neulist R, Fichtel I, Ehret G. 1997. The auditory cortex of the house mouse: left-right differences, tonotopic organization and quantitative analysis of frequency representation. *J Comp Physiol A* 181:559–571.
- Tsukano H, Horie M, Bo T, Uchimura A, Hishida R, Kudoh M, Takahashi K, Takebayashi H, Shibuki K. 2015. Delineation of a frequency-organized region isolated from the mouse primary auditory cortex. *J Neurophysiol* 113:2900–2920.
- Van Der Kooy D, Kolb B. 1985. Non-cholinergic globus pallidus cells that project to the cortex but not to the subthalamic nucleus in rat. *Neurosci Lett* 57:113–118.
- Wang Q, Burkhalter A. 2007. Area map of mouse visual cortex. *J Comp Neurol* 502:339–357.
- Watts DJ, Strogatz SH. 1998. Collective dynamics of “small-world” networks. *Nature* 393:440–442.
- Wickersham IR, Sullivan HA, Seung HS. 2010. Production of glycoprotein-deleted rabies viruses for monosynaptic tracing and high-level gene expression in neurons. *Nat Protoc* 5:595–606.
- Winer JA, Sally SL, Larue DT, Kelly JB. 1999. Origins of medial geniculate body projections to physiologically defined zones of rat primary auditory cortex. *Hear Res* 130:42–61.
- Yonehara K, Balint K, Noda M, Nagel G, Bamberg E, Roska B. 2011. Spatially asymmetric reorganization of inhibition establishes a motion-sensitive circuit. *Nature* 469:407–410.
- Zingg B, Hintiryan H, Gou L, Song MY, Bay M, Bienkowski MS, Foster NN, Yamashita S, Bowman I, Toga AW, Dong H-W. 2014. Neural Networks of the Mouse Neocortex. *Cell* 156:1096–1111.

## Abbreviation

AAD  
AAV  
AIP  
AM  
AMV  
APT  
APTD  
APTV  
AStr  
Au1  
AuD  
AuV  
AV  
B  
BIC  
BMP  
Cg/RS  
Cg1  
Cg2  
Cl  
cp  
CPu  
DEn  
DI  
DLO  
DM  
DpMe  
DRC  
ec  
Ect  
Eth  
FrA  
GI  
HDB  
ic  
IGL  
LDVL  
LEnt  
LGP  
LH  
LO  
LPLR  
LPMR  
LPtA  
M1  
M2  
MEnt  
MGD  
MGM  
MGP  
MGV  
MO  
MPtA  
MZMG  
Or  
PaS  
PF  
PIL  
Pir

## Brain area

anterior amygdaloid area, dorsal part  
anterior amygdaloid area, ventral part  
agranular insular cortex, posterior part  
anteromedial thalamic nucleus  
anteromedial thalamic nucleus, ventral part  
anterior pretectal nucleus  
anterior pretectal nucleus, dorsal part  
anterior pretectal nucleus, ventral part  
amygdalostriatal transition area  
primary auditory cortex  
secondary auditory cortex, dorsal area  
secondary auditory cortex, ventral area  
anteroventral thalamic nucleus  
basal nucleus (Meynert)  
nucleus of the brachium of the inferior colliculus  
basomedial amygdaloid nucleus, posterior part  
cingulate/retrosplenial cortex  
cingulate cortex, area 1  
cingulate cortex, area 2  
claustrum  
cerebral peduncle, basal part  
caudate putamen (striatum)  
dorsal endopiriform cortex  
dysgranular insular cortex  
dorsolateral orbital cortex  
dorsomedial hypothalamic nucleus  
deep mesencephalic nucleus  
dorsal raphe nucleus, caudal part  
external capsule  
ectorhinal cortex  
ethmoid thalamic nucleus  
frontal association cortex  
granular insular cortex  
nucleus of the horizontal limb of the diagonal band  
internal capsule  
intergeniculate leaf  
laterodorsal thalamic nucleus, ventrolateral part  
lateral entorhinal cortex  
lateral globus pallidus  
lateral hypothalamic area  
lateral orbital cortex  
lateral posterior thalamic nucleus, laterorostral part  
lateral posterior thalamic nucleus, mediorostral part  
lateral parietal association cortex  
primary motor cortex  
secondary motor cortex  
medial entorhinal cortex  
medial geniculate nucleus, dorsal part  
medial geniculate nucleus, medial part  
medial globus pallidus  
medial geniculate nucleus, ventral part  
medial orbital cortex  
medial parietal association cortex  
marginal zone of the medial geniculate  
oriens layer of the hippocampus  
parasubiculum  
parafascicular thalamic nucleus  
posterior intralaminar thalamic nucleus  
piriform cortex

|      |                                                   |
|------|---------------------------------------------------|
| PLi  | posterior limitans thalamic nucleus               |
| Po   | posterior thalamic nuclear group                  |
| PoT  | posterior thalamic nuclear group, triangular part |
| PRh  | perirhinal cortex                                 |
| PrL  | prelimbic cortex                                  |
| PrS  | presubiculum                                      |
| Py   | pyramidal cell layer of the hippocampus           |
| Re   | reuniens thalamic nucleus                         |
| RPF  | retroparafascicular nucleus                       |
| RSA  | retrosplenial agranular cortex                    |
| RSG  | retrosplenial granular cortex                     |
| Rt   | reticular thalamic nucleus                        |
| S    | subiculum                                         |
| S1   | primary somatosensory cortex                      |
| S1BF | primary somatosensory cortex, barrel field        |
| S1DZ | primary somatosensory cortex, dysgranular region  |
| S1FL | primary somatosensory cortex, forelimb region     |
| S1HL | primary somatosensory cortex, hindlimb region     |
| S1Sh | primary somatosensory cortex, shoulder region     |
| S1Tr | primary somatosensory cortex, trunk region        |
| S2   | secondary somatosensory cortex                    |
| SG   | suprageniculate thalamic nucleus                  |
| SI   | substantia innominata                             |
| SNL  | substantia nigra, lateral part                    |
| SNR  | substantia nigra, reticular part                  |
| st   | stria terminalis                                  |
| STh  | subthalamic nucleus                               |
| Sub  | submedius thalamic nucleus                        |
| SubB | subbrachial nucleus                               |
| SubI | subincertal nucleus                               |
| SuMM | supramammillary nucleus, medial part              |
| TC   | tuber cinereum area                               |
| Te   | terete hypothalamic nucleus                       |
| TeA  | temporal association area                         |
| V1   | primary visual cortex                             |
| V2L  | secondary visual cortex, lateral area             |
| V2ML | secondary visual cortex, mediolateral area        |
| V2MM | secondary visual cortex, mediomedial area         |
| VEn  | ventral endopiriform nucleus                      |
| VM   | ventromedial thalamic nucleus                     |
| VO   | ventral orbital cortex                            |
| VPM  | ventral posteromedial thalamic nucleus            |
| VRe  | ventral reuniens thalamic nucleus                 |
| ZI   | zona incerta                                      |
| ZID  | zona incerta, dorsal part                         |
| ZIV  | zona incerta, ventral part                        |

**Table 1: Alphabetic list of brain area abbreviations based on the mouse brain atlas (Paxinos and Franklin 2001).**



## 614 **Figure Legends**

### 615 **Figure 1**

#### 616 **Example of an injection site.**

617 **A.** Coronal section through the injection site. The brightly labeled neurons have  
618 retrogradely transported the mCherry<sup>+</sup> rabies virus to their somata and dendrites. Note the  
619 labeling in the cortex surrounding the injection site and in the thalamus.

620 **B.** The same coronal section showing cells labeled with NeuN. At the injection site, the  
621 tissue is slightly damaged. The asterisk (\*) denotes the center of the injection site. Scale  
622 bars 1 mm.

623 **C. Mean FLNe ('fraction of labeled neurons extrinsic') values.** The FLNe, or input  
624 weight, is shown on a logarithmic scale for all brain areas with labeled cells. Cortical areas  
625 are written in bold. The projections from the contralateral hemisphere (grey triangles) are  
626 generally lower and sparser than from the ipsilateral hemisphere (black circles), but follow  
627 a similar pattern of relative weights. Error bars denote the relative standard deviation.

#### 628 **D. Distance-dependence of FLN of the ipsilateral cortex.**

629 Mean FLN values sorted according to the distance of area centers to the injection site. Ca.  
630 90 % of labeled neurons in the ipsilateral cortex were found within 1 mm distance, while  
631 the longest projections spanned 7 mm. Average FLN values and standard deviations are  
632 plotted as a function of distance to the primary auditory cortex. The curve is an exponential  
633 fit:  $FLN = 17.76 * \exp(-1.457 * \text{distance})$  (R-square: 0.93). Areas above the curve show  
634 relatively stronger projection weights for their distance. Au1: primary auditory cortex. FLN:  
635 fraction of labeled neurons.

636 **E. Mean SLN (fraction of labeled supragranular layer neurons) values of cortical**  
637 **areas.** Cortical areas were sorted based on the mean SLN values, from purely  
638 feedforward (SLN=1) to feedback (SLN=0), with standard deviations. Note that apart from

639 three exceptions, all areas project in a lateral or feedback fashion to Au1, i.e. with SLN  
640 values between 0.5 and 0. Since the piriform cortex (Pir, marked by an asterisk) is part of  
641 the three-layered archicortex, its SLN could not be determined and was set to 0 because  
642 most of the labeled cells were found in the deep layer 3. Other areas without a dark bar  
643 had an SLN of 0. Areas without error bars were either represented by one animal only or  
644 had identical SLNs in the different animals. In the contralateral hemisphere, fewer areas  
645 are shown because fewer areas contained labeled cells. For area abbreviations see  
646 Table 1.

647

## 648 **Figure 2**

649 **A. Distribution of labeled cells in one brain.** Coronal sections containing labeled  
650 neurons (in magenta) and stained for NeuN (in green). Sections are ordered from posterior  
651 to anterior from the top left to the bottom right. Numbers below the sections correspond to  
652 the distance from Bregma (positive values are anterior from Bregma). If only one  
653 hemisphere is shown, it is the hemisphere ipsilateral to the injection. White arrows point  
654 out single cells or group of cells in temporal association area, rhinal, visual, auditory,  
655 somatosensory, motor and orbital cortices as well as in the inferior colliculus, the auditory  
656 thalamus and the striatum. Borders of subcortical areas are only delineated if they contain  
657 retrogradely labeled neurons or are adjacent to such an area. Am: amygdala; For other  
658 area abbreviations see Table 1. Scale bars 1 mm.

659 **B. Overview of FLNe and SLN values.** The areas are arranged according to  
660 hemispheres and their approximate antero-posterior and medio-lateral position. Colors  
661 indicate SLN (blue corresponding to feedforward and dark red to feedback connections),  
662 line thicknesses correspond to the FLNe. The dots represent different mice; filled dots  
663 indicate a labeled area in the corresponding mouse.

664 FLNe: extrinsic fraction of labeled neurons. SLN: fraction of labeled supragranular layer  
665 neurons. For area abbreviations see Table 1.

666

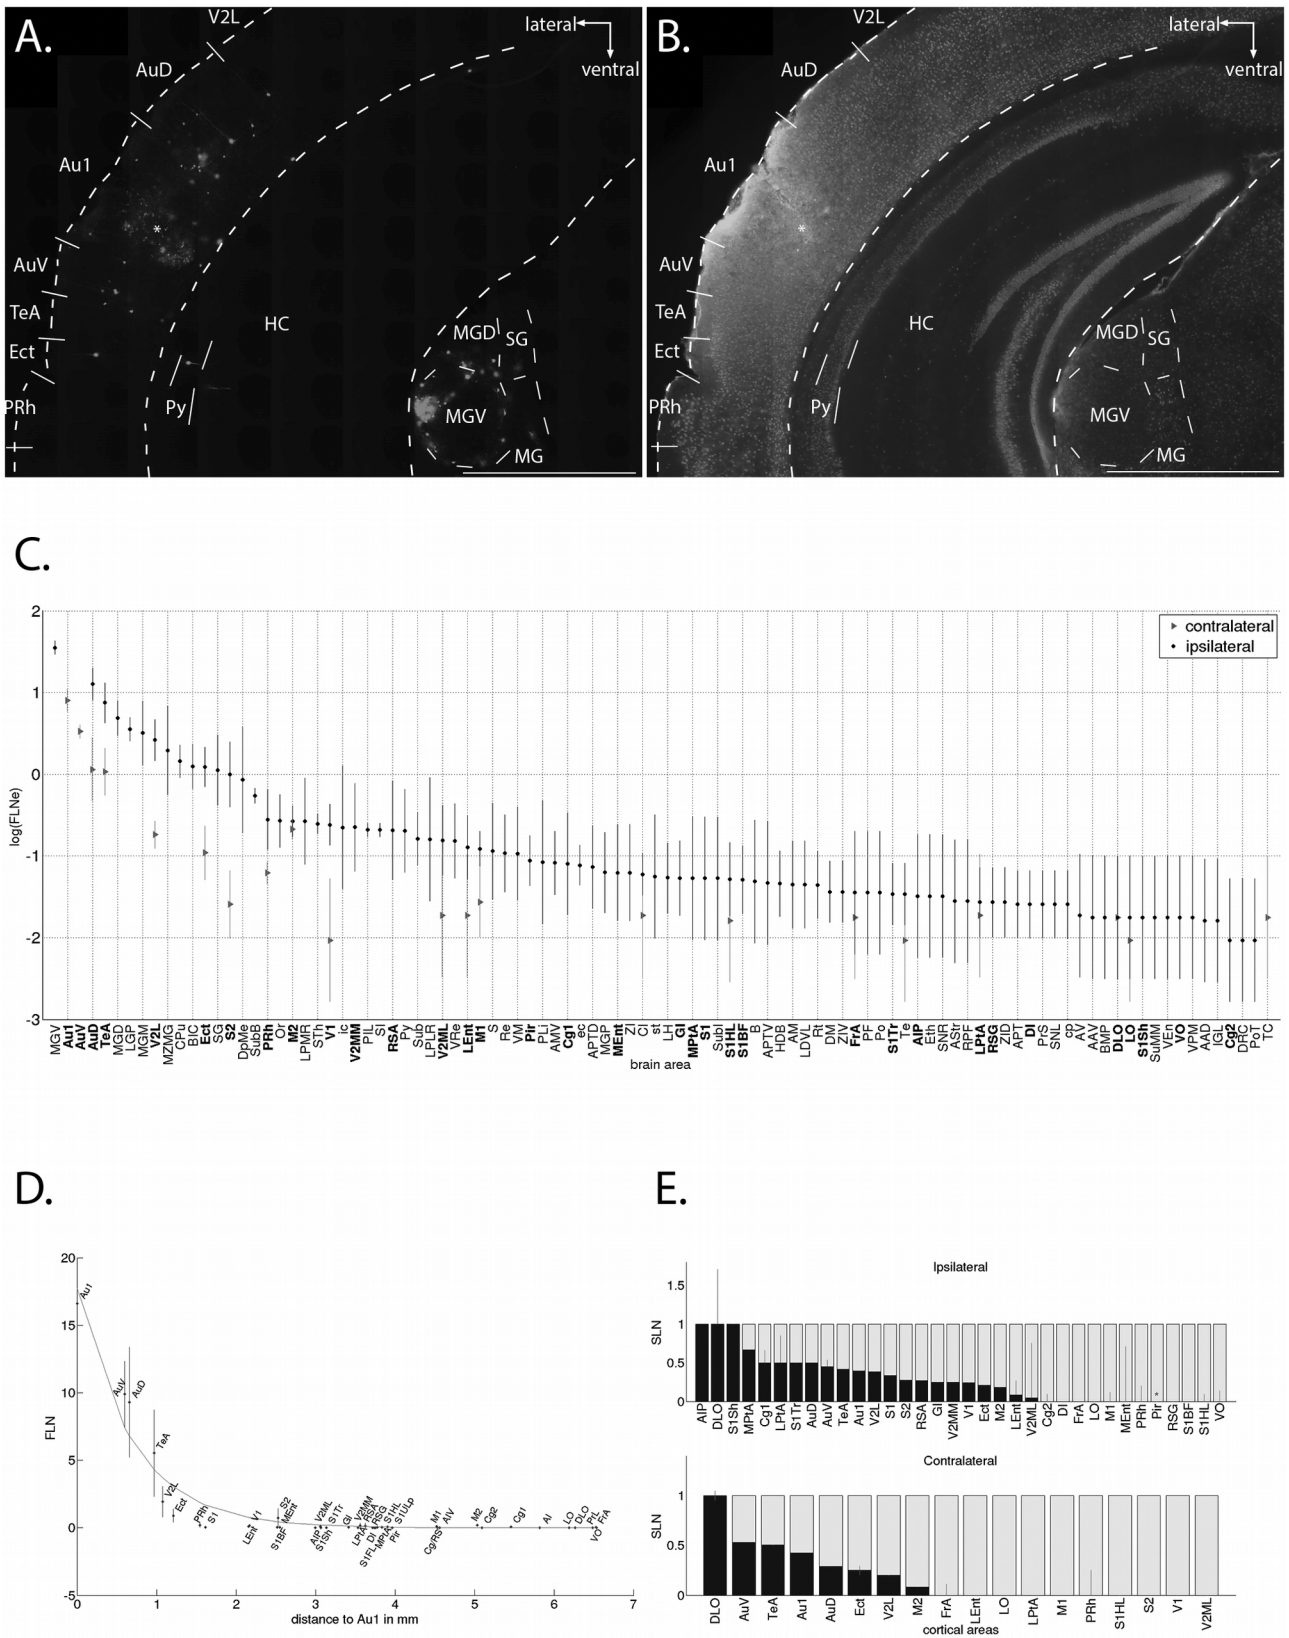

Figure 1

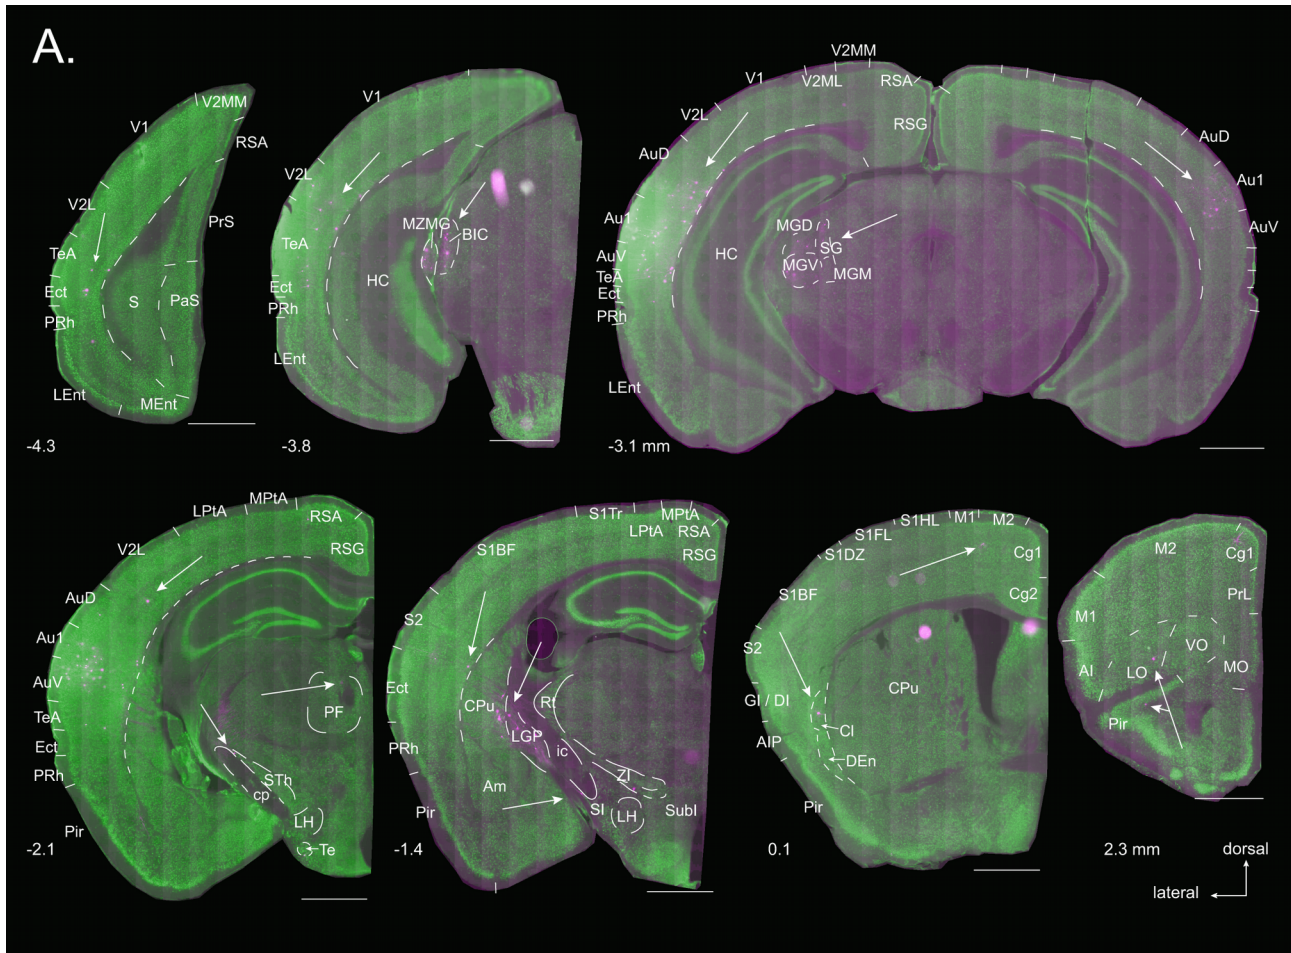

**B.**

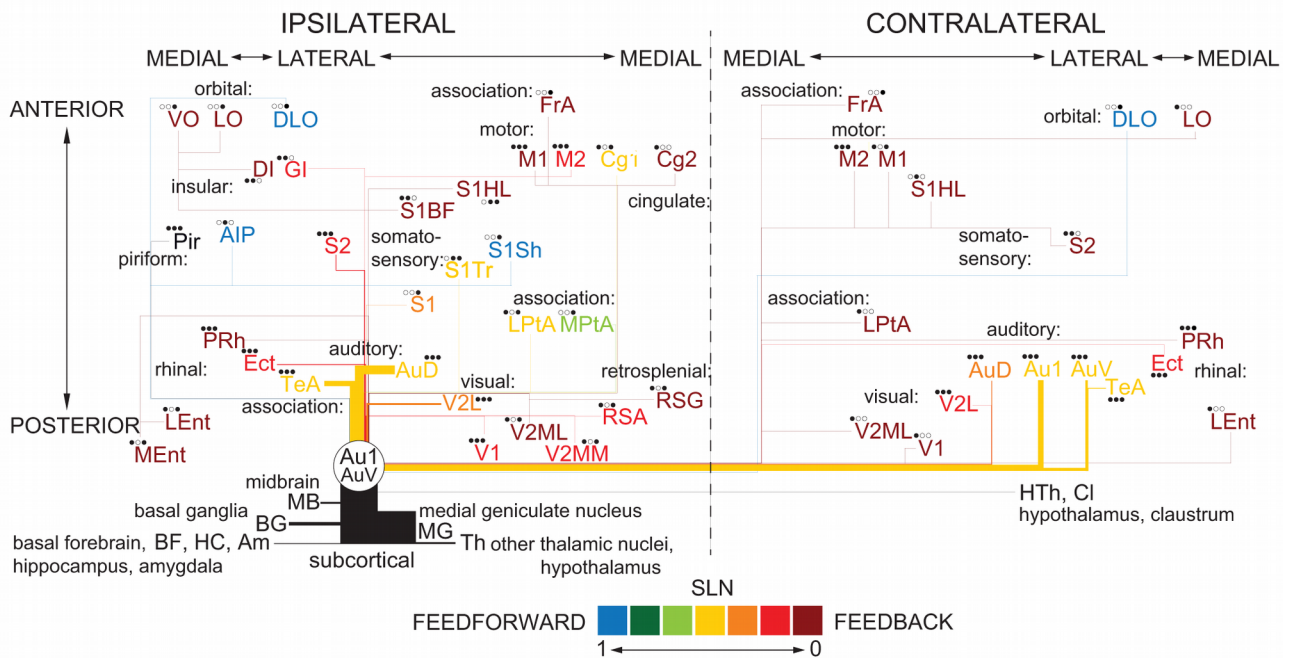

Figure 2
